# Supplementary material for: The Epitope Basis of Embryonic Stem Cell‐Induced Antitumor Immunity against Bladder Cancer
Source: PubMed Central journal article supplement — Adv Healthc Mater. 2022 Dec 23;12(9):2202691. doi: 10.1002/adhm.202202691 (PMC11468705; doi:10.1002/adhm.202202691), 2022-12-23
Supplement: ADHM-12-2202691-s001.pdf [file ADHM-12-2202691-s001.pdf]

# ADVANCED HEALTHCARE MATERIALS

## Supporting Information

for *Adv. Healthcare Mater.*, DOI 10.1002/adhm.202202691

The Epitope Basis of Embryonic Stem Cell-Induced Antitumor Immunity against Bladder Cancer

*Meiling Jin, Jingchu Hu, Lili Tong, Bao-Zhong Zhang and Jian-Dong Huang\**

# **The epitope basis of embryonic stem cell-induced antitumor immunity against bladder cancer**

Meiling Jin<sup>1#</sup>; Jingchu Hu<sup>1#</sup>; Lili Tong<sup>1</sup>, Bao-zhong Zhang<sup>1</sup>; Qian Wang<sup>1</sup>; Jian-Dong Huang<sup>1,2,3,4 \*</sup>

<sup>1</sup> Chinese Academy of Sciences (CAS) Key Laboratory of Quantitative Engineering Biology, Shenzhen Institute of Synthetic Biology, Shenzhen Institutes of Advanced Technology, Chinese Academy of Sciences, Shenzhen, China.

<sup>2</sup> School of Biomedical Sciences, Li Ka Shing Faculty of Medicine, The University of Hong Kong, Pokfulam, Hong Kong SAR, China.

<sup>3</sup> Department of Clinical Oncology, Shenzhen Key Laboratory for cancer metastasis and personalized therapy, The University of Hong Kong-Shenzhen Hospital

<sup>4</sup> Guangdong-Hong Kong Joint Laboratory for RNA Medicine, Sun Yat-Sen University, Guangzhou, China 510120.

Correspondent: jdhuang@hku.hk, Tel: +852 39176810; fax: +852 39176810

Supplementary data.

Methods:

#### 1. Histopathology of explanted organs

At the time of sacrifice, tumors were explanted from vaccinated mice and processed for histopathology. The organs were fixed overnight in 4% paraformaldehyde and transferred to 70% ethanol for 24 h. Fixed samples were embedded in paraffin and cut into 5-mm sections, followed by staining with hematoxylin and eosin (H&E) for the histological analysis.

#### 2. LEGENDplex multiplex cytokine assay

Serum was collected from vaccinated mice. The profiling of cytokines in serum was performed in a Flow Cytometer analyzer using fluorescence-encoded beads (LEGENDplex, BioLegend, San Diego, CA) in which the Mouse Th Cytokine Panel (category no. 741044, 12-plex for IL-2, IL-4, IL-5, IL-6, IL-9, IL-10, IL-13, IL-17A, IL-17F, IL-22, IFN- $\gamma$ , and TNF- $\alpha$ ) were selected.

#### 3. ESCs degradation detection

Stain ESCs with dissolved VivoTrack 680 (0.2mg of dye in 1g of PEG). Incubate for 15 min at room temperature, protected from light, washing by adding 15-20 mL PBS containing 1% FBS. Male C57BL/6 mice (n=3) were injected with  $5 \times 10^5$  MB49 bladder cancer cells s.c. in the right flank, after one week, mice were immunized with stained ESCs (129), and ESCs were observed using in vivo imaging system spectrum 0 h, 2 h, 20 h after the injection.

#### 4. Peptide synthesis

Epitope peptides were synthesized by GL Biochem (Shanghai, China). Briefly, weigh 0.3mmol (0.87g) of Fmoc-Gly-Wang Resin with a substitution degree of 0.344mmol/g. Put the weighed dry resin into the reaction column, and add solvent to

swell. The Fmoc protection was removed with hexahydro pyridone. Weigh the second amino acid Fmoc-Cys(Trt)-OH at the C-terminal, put the condensing agent TBTU DIEA into the reaction column, and react with DMF as the solvent for 30min. Use a certain proportion of ninhydrin solution to detect whether the coupling is complete. Repeat these steps until the last amino acid is connected, then weigh Fmoc-Ala-OH and condensing agent TBTU, put them into the reaction column, react with DMF for 30 minutes, and remove Fmoc protection with hexahydro pyridone. Finally, wash 3 times with methanol, the resin shrinks, and drain. Use TFA cutting solution to cut the resin, and dilute the precipitate with ether to obtain the crude peptide. Purified peptide.

#### 5. Tumor-infiltrating lymphocyte (TIL) isolation and CD8<sup>+</sup> T cell isolation

Briefly, tumors were initially divided into segments and then finely diced into RPMI1640 containing 20% FBS, 1mg/ml collagenase type 4 (Worthington Biochemical, Lakewood, NJ), 30 U/ml DNase (Roche Diagnostics, Indianapolis, IN, USA), and was incubated for 30min at 37 °C on a rocker. Digested tumor pieces were teased through a 70- $\mu$ m sieve. Then, the sieve was irrigated with Dulbecco's PBS, and the cells were collected into a 50-ml conical tube. Pelleted cells underwent different gradient percoll solutions and centrifuge for 30 min at 400g. Then collect lymphocytes at the middle stage. Wash cells with PBS and counted the cells for Elispot. After isolating the lymphocytes from tumors, then CD8<sup>+</sup> T cells were sorted by magnetic beads (Miltenyi Biotec, 130-104-075).

#### 5. Evaluate the effects of adjuvant on tumor growth inhibition

Peptides were dissolved in DMSO or PBS. Vaccine formulations were prepared by mixing 100 µg of peptides with 1 µM CpG ODN 1826, or 5µg Poly IC (TLR3 agonist), or 1µM cGAMP (sting activator) in PBS at a final injection volume of 100 µL per mouse. Control vaccine formulations were prepared using PBS in place of the epitope peptides.

Legend:

Figure S1: (a) In the therapeutic mouse model, Vaccination of C57BL/6 mice with PBS, ESC (129)+ GM-CSF, CpG +GM-CSF, ESC (129) + CpG + GM-CSF resulted in a significant reduction of MB49 tumor sizes (n = 5), (b) In the therapeutic model, mice were injected with PBS, E(C57) vaccine or E(C57)+CpG, and the tumor growth was measured every two days (n=6). (c) In the therapeutic model, mice were injected with PBS, CpG, E(129), E(129)+C+G, E(C57) vaccine or E(C57)+CpG, and tumor growth was captured 2 weeks or 4 weeks after tumor inoculation (n=4). (d) ESC vaccination increases percentages of effector and memory CD8<sup>+</sup> T cells. 2 weeks after tumor inoculation in the prophylactic mouse model, ESC (129) + CpG vaccinated C57BL/6 mice showed a significant increase in the percentage of cytotoxic T cells (CD8<sup>+</sup>granzyme-B<sup>+</sup>), effector/memory CD8<sup>+</sup> T cells (CD8<sup>+</sup>CD44<sup>+</sup>) in the dLN (n=3). (Data represent mean ± SEM, ANOVA with Tukey's multiple comparison test; \*p< 0.05, \*\*p < 0.001, \*\*\*p< 0.001).

Figure S2 ESCs vaccination leads to a systemic immune profile in the low level

(a and b) LEGENDplex multiplex cytokine analysis of serum from the different treatment groups 4 weeks after tumor cell introduction reveals a significantly lower presence of systemic cytokines in the vaccination mice (ESC (129) + CpG/ESC (129) +CpG +GM-CSF) compared to PBS control mice (PBS) (n=3). (c) In the therapeutic model, ESCs vaccination leads to immune cell infiltration into tumors. C57BL/6 mice were vaccinated with ESC (129) + CpG + GM-CSF for four weeks, the tumor was

stained with CD11c<sup>+</sup> and CD4<sup>+</sup> specific antibodies, respectively (n=3). (d, e) In the prophylactic mouse model, mice were injected with PBS, CpG, E(129), E(129)+C, E(C57) vaccine or E(C57)+CpG, and the infiltration of immune cells (CD3, CD4, CD8, and Treg) in tumors were tested after 4 weeks of tumor inoculation (n=3). (Data represent mean  $\pm$  SEM, ANOVA with Tukey's multiple comparison test; \* $p$  < 0.05, \*\* $p$  < 0.001, \*\*\* $p$  < 0.001).

Figure S3 (a) Further selection of genes highly expressed in tumor tissues across multiple cancer types. (b) Analysis of four ESCs-cancer signature gene mRNA expression in major human cancer types and normal tissues. (c) Prediction of selective epitopes.

Figure S4. (a) IFN- $\gamma$  ELISPOT assay for ECT2-3, TOP2 $\alpha$ -1, and TOP2 $\alpha$ -2 peptides, Quantitative analysis of the ELISPOT assay for IFN $\gamma$  secretion (n = 4). (b) In the therapeutic model, mice were injected with PBS, peptides+CpG, peptides+Poly IC, or peptides+cGAMP, the tumor volume was measured every two days, IFN- $\gamma$  ELISPOT assay for Anln, Ect2-1 and Ect2-2 peptides was performed. Quantitative analysis of the ELISPOT assay for IFN $\gamma$  secretion (n=5). (c) In the therapeutic model, mice treated with different peptides plus CpG and combined peptides + CpG were compared, and tumor volume was measured every two days (n=5). (d) IFN- $\gamma$  ELISPOT assay for Melk was performed using TIL. Quantitative analysis of the ELISPOT assay for IFN $\gamma$  secretion was shown (n=4). (e) NK, MDSC, and T cell groups were measured by flow cytometry (n=3) (Data represent mean  $\pm$  SEM, ANOVA with Tukey's multiple comparison test; \* $p$  < 0.05, \*\* $p$  < 0.001, \*\*\* $p$  < 0.001).

Figure S5. Irradiated ESCs were digested by immune cells. ESCs were stained with VivoTrack 680, and ESCs changes were observed using in vivo imaging system spectrum in 2 or 20 h after injection (n=3).

Figure S6 In the therapeutic model, flow cytometry data for PBMC samples (a, b) and dLN samples from the mice injected with PBS or E(129)+C +G (c, d). In the therapeutic model, flow cytometry data for dLN samples from the mice injected with PBS or E(C57) (e, f) (n=3).

Figure S1

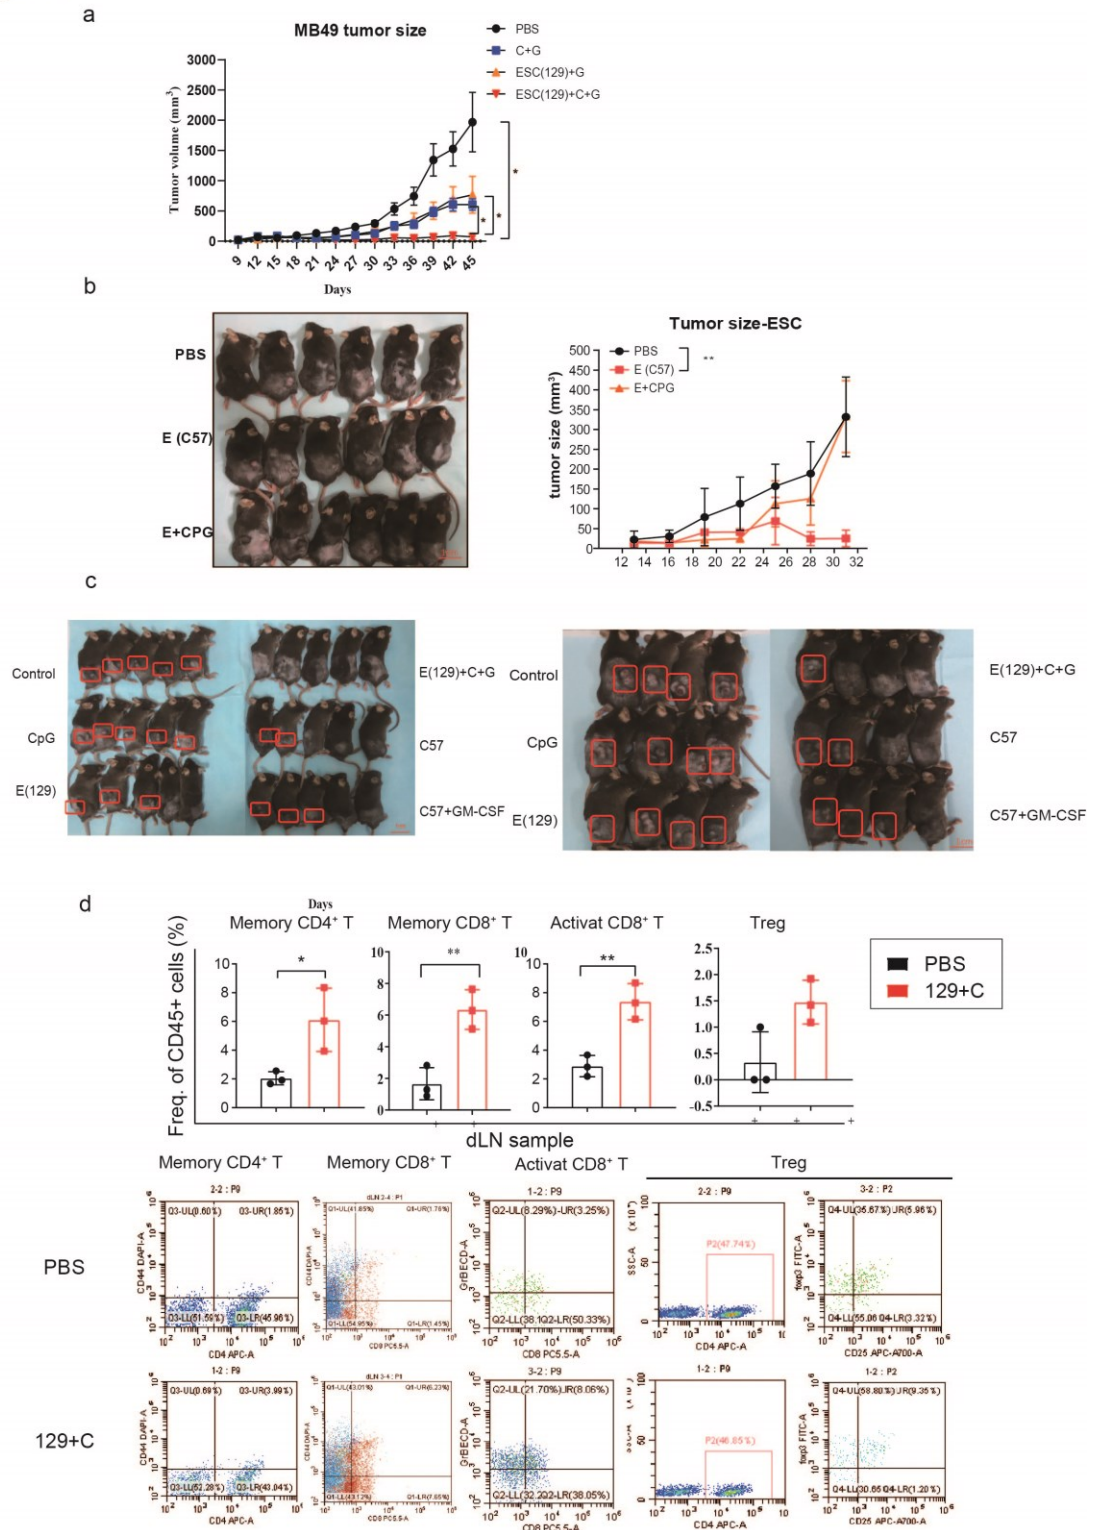



Figure S2

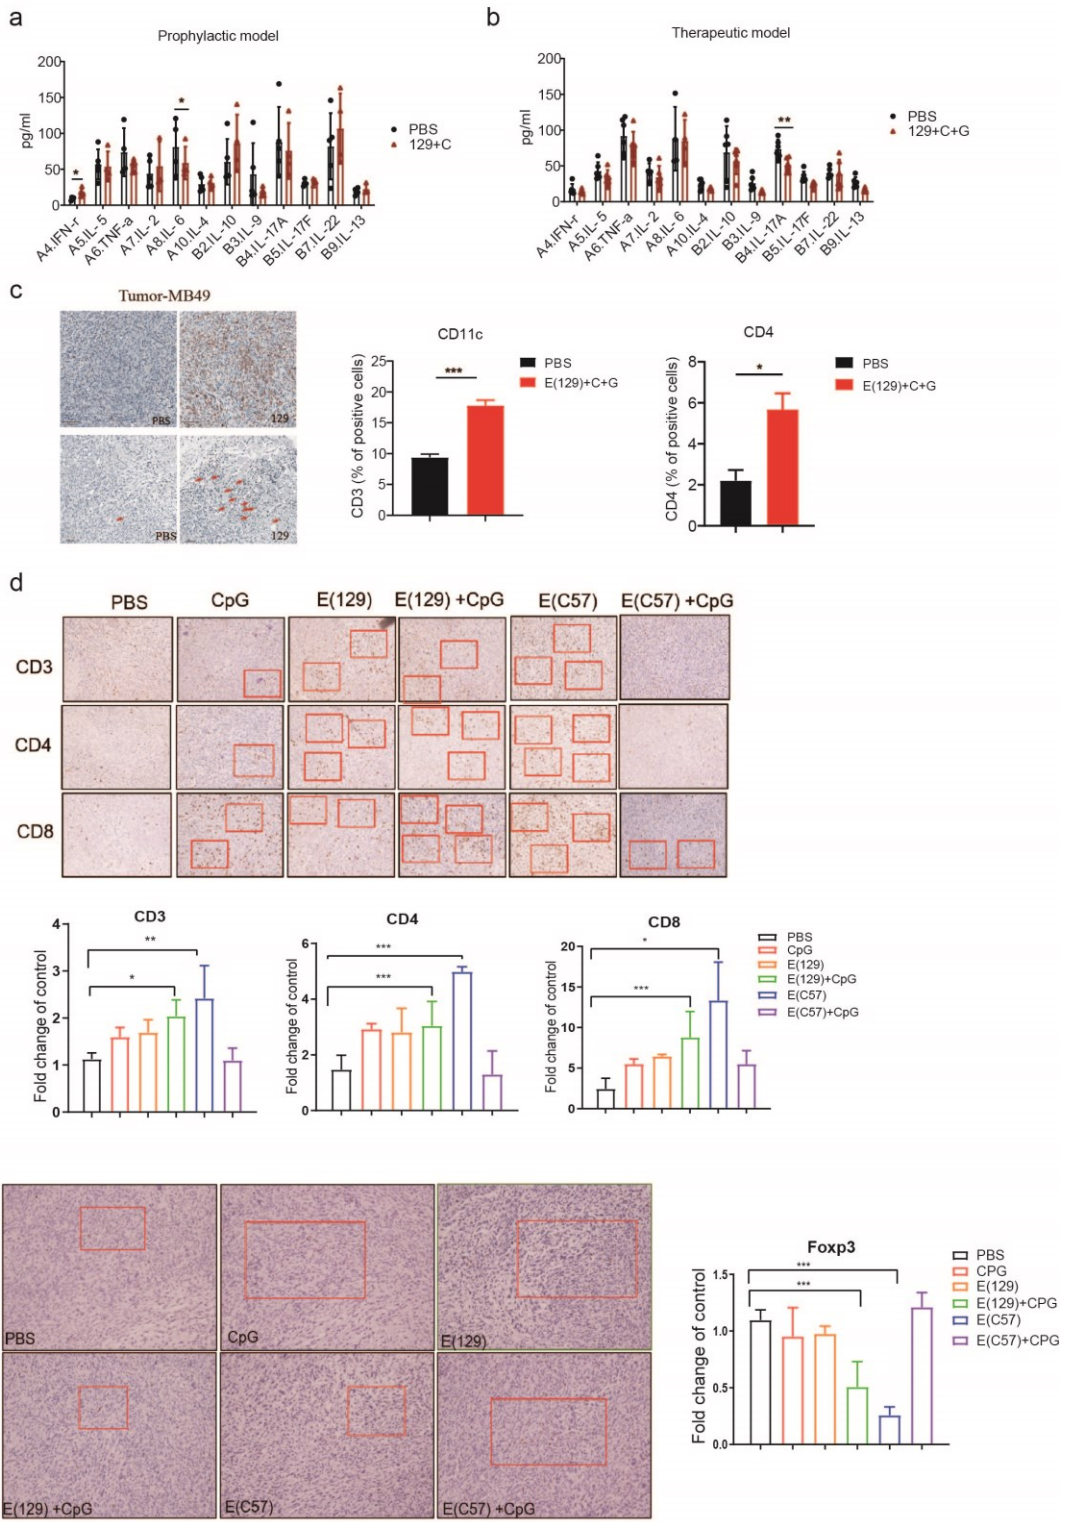

Figure S3

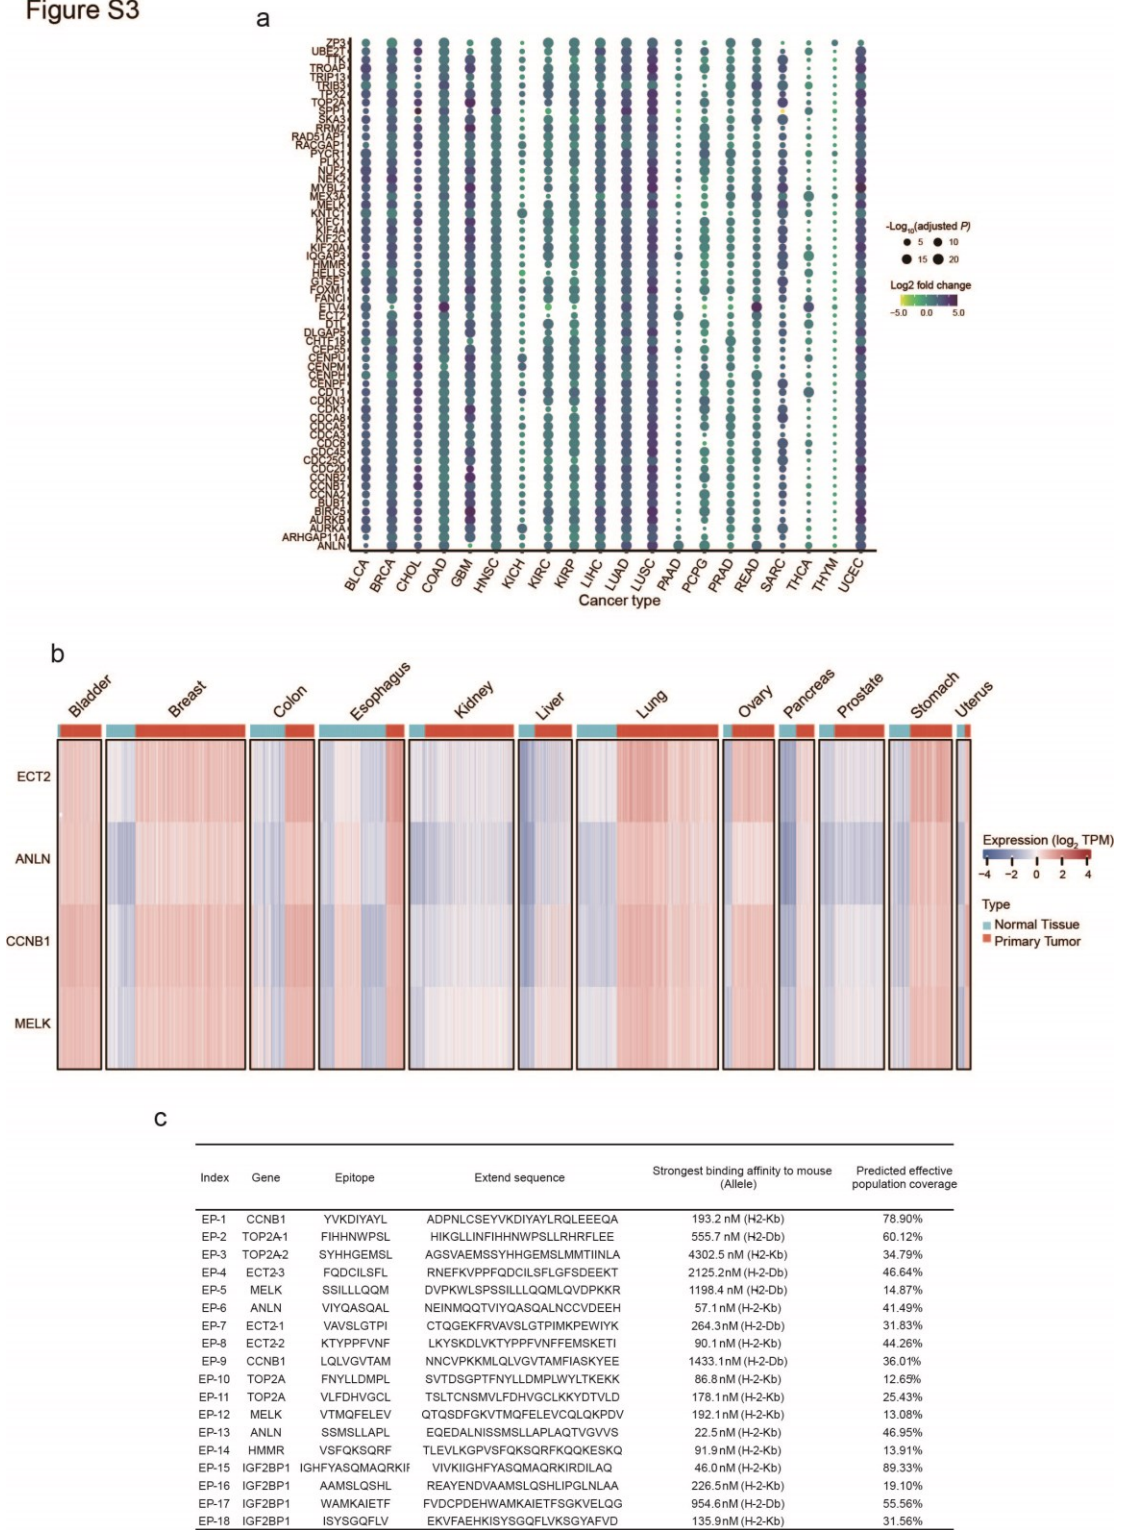

Figure S4

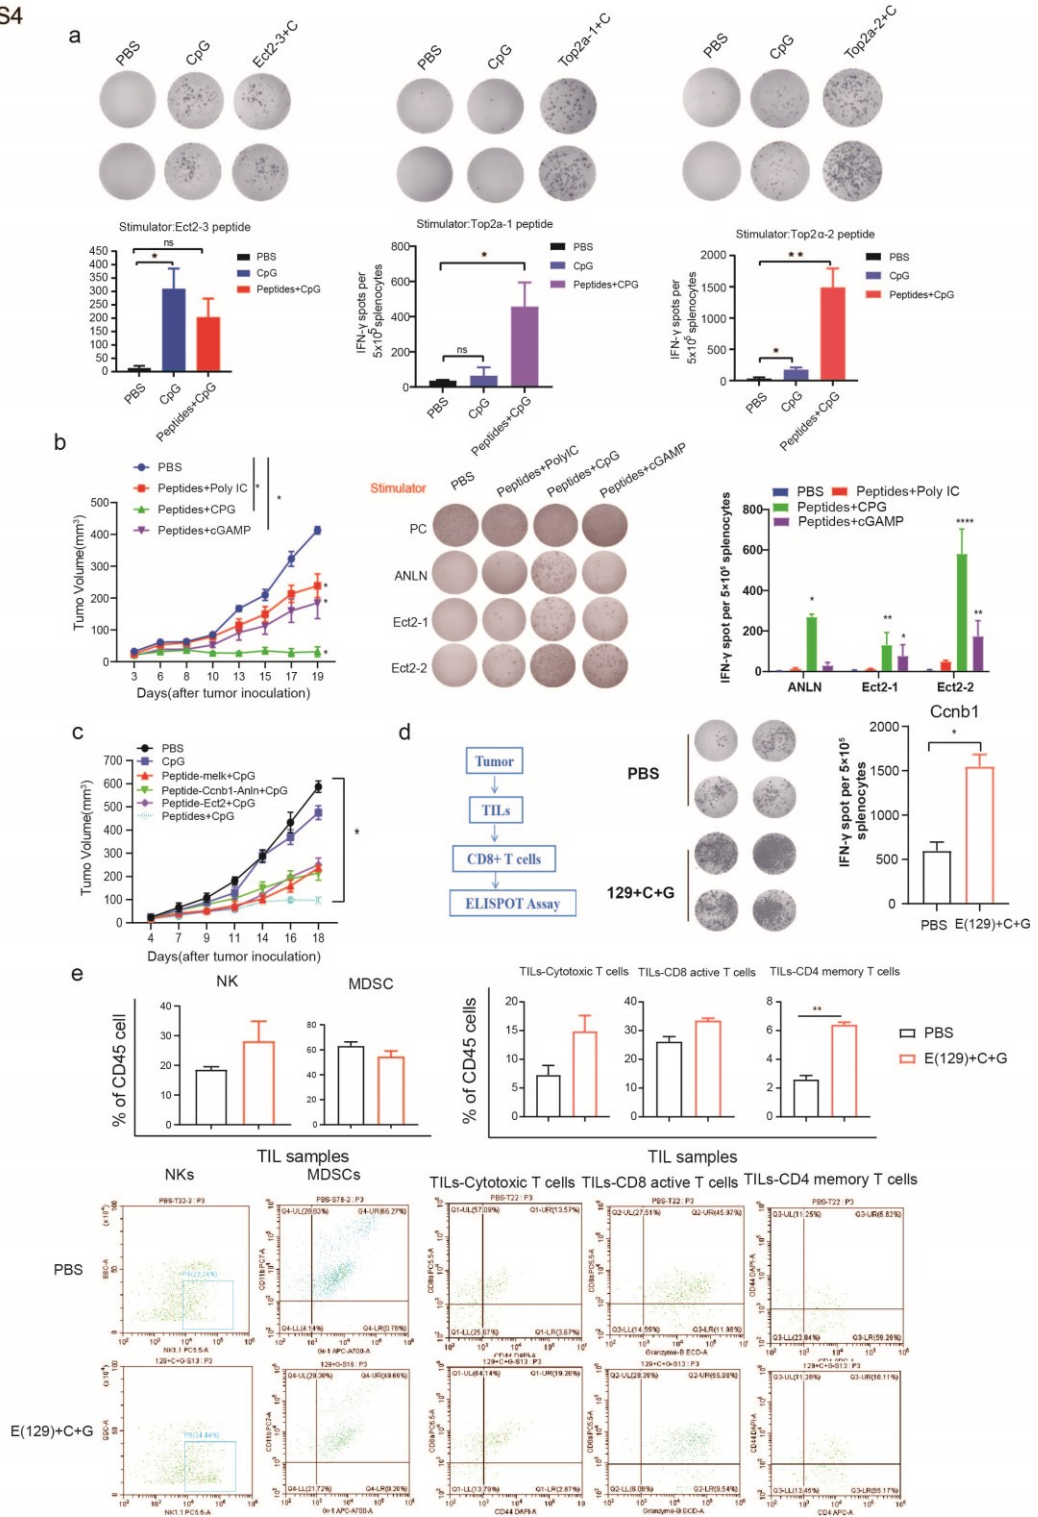

Figure S5

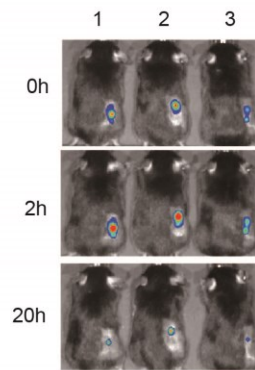

Figure S6

a

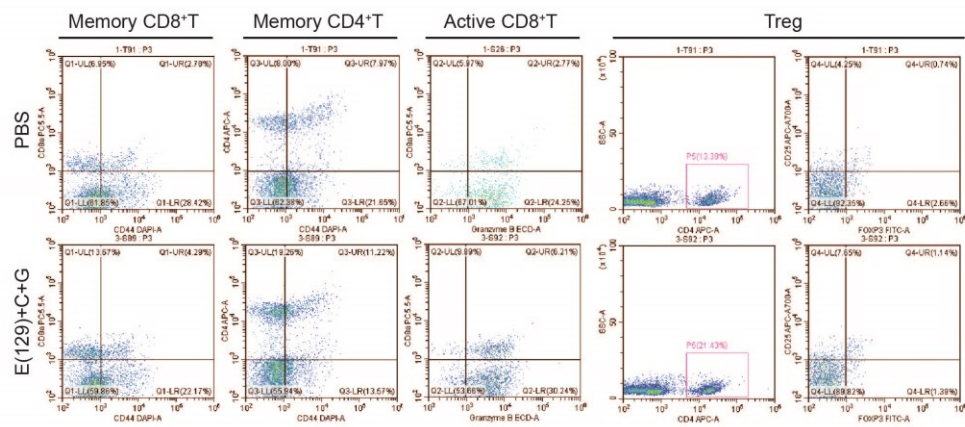

b

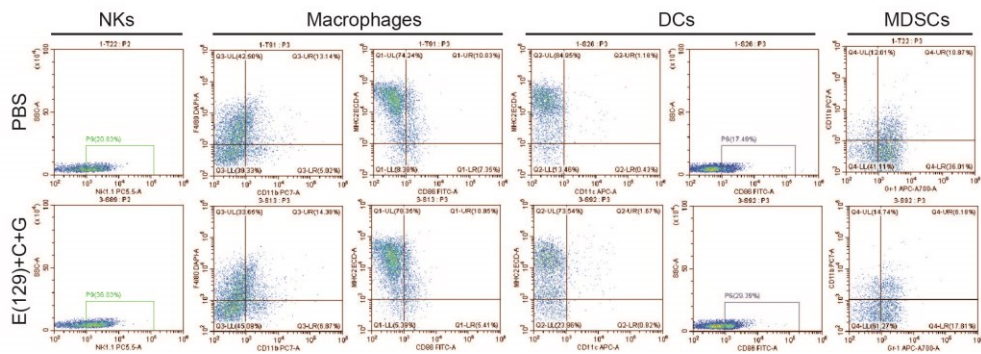

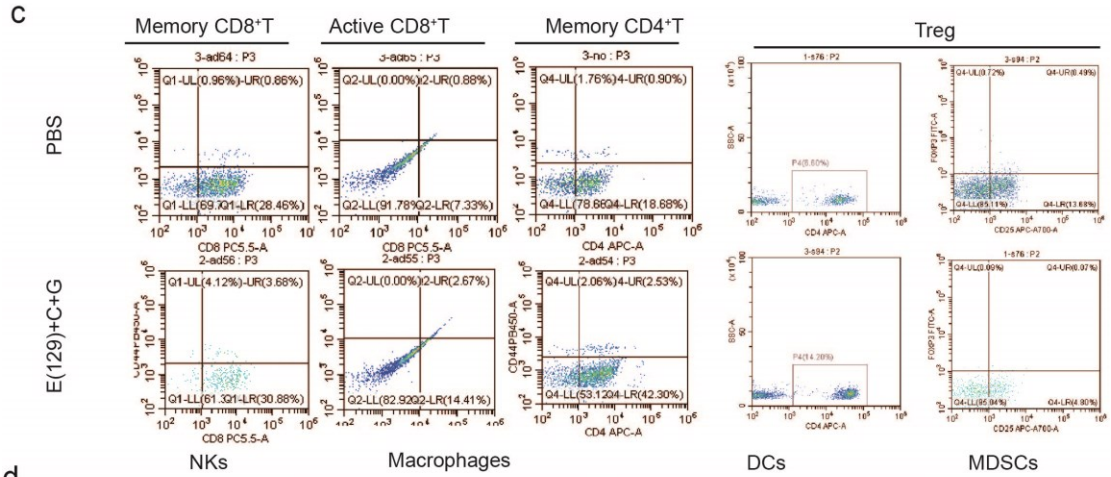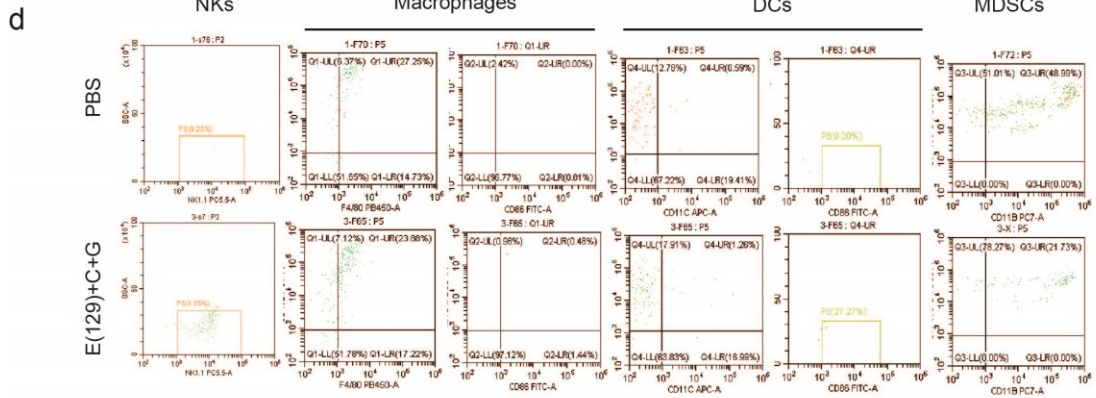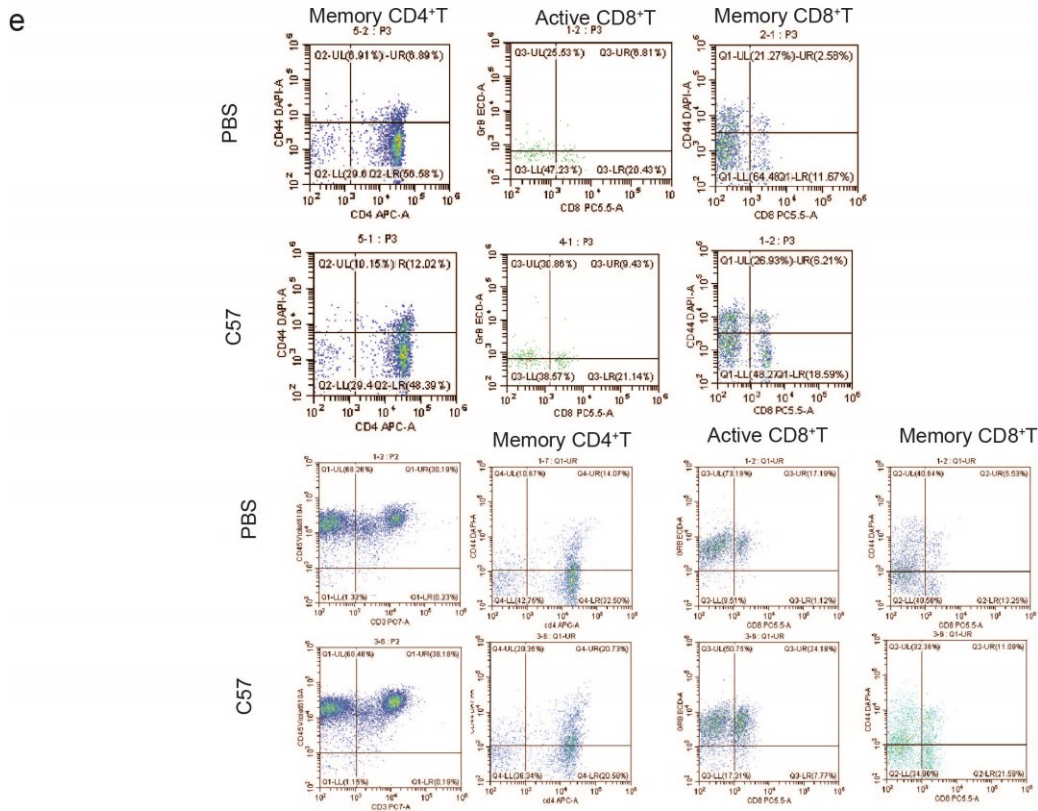

|    | Table S1: Reagent or resource antibody                                       | source        | identifier |
|----|------------------------------------------------------------------------------|---------------|------------|
| 1  | PE/Cy7 anti-mouse CD3                                                        | Biolegend     | 100220     |
| 2  | APC anti-mouse CD4                                                           | Biolegend     | 100412     |
| 3  | Alexa Fluor® 700 anti-mouse CD25                                             | Biolegend     | 102024     |
| 4  | PerCP/Cyanine5.5 anti-mouse CD8a                                             | Biolegend     | 100733     |
| 5  | Pacific Blue™ anti-mouse/human CD44                                          | Biolegend     | 103020     |
| 6  | Brilliant Violet 605™ anti-mouse CD45                                        | Biolegend     | 103139     |
| 7  | PE/Dazzle™ 594 anti-human/mouse Granzyme B Recombinant                       | Biolegend     | 372207     |
| 8  | Alexa Fluor® 488 anti-mouse FOXP3                                            | Biolegend     | 126405     |
| 9  | PE anti-mouse H-2Dk                                                          | Biolegend     | 110307     |
| 10 | Brilliant Violet 421™ anti-mouse F4/80                                       | Biolegend     | 123131     |
| 11 | PE/Dazzle™ 594 anti-mouse I-A/I-E                                            | Biolegend     | 107647     |
| 12 | FITC anti-mouse CD86                                                         | Biolegend     | 105005     |
| 13 | PE/Cy7 anti-mouse/human CD11b                                                | Biolegend     | 101215     |
| 14 | APC anti-mouse CD11c                                                         | Biolegend     | 117309     |
| 15 | PerCP/Cyanine5.5 anti-mouse CD49b (pan-NK cells)                             | Biolegend     | 108915     |
| 16 | Alexa Fluor® 700 anti-mouse Ly-6G/Ly-6C (Gr-1)                               | Biolegend     | 108421     |
| 17 | PE/Cy7 Rat IgG2b, κ Isotype Ctrl                                             | Biolegend     | 400617     |
| 18 | APC Rat IgG2b, κ Isotype Ctrl                                                | Biolegend     | 400611     |
| 19 | PerCP/Cyanine5.5 Rat IgG2a, κ Isotype Ctrl                                   | Biolegend     | 400531     |
| 20 | Pacific Blue™ Rat IgG2b, κ Isotype Ctrl                                      | Biolegend     | 400627     |
| 21 | Brilliant Violet 605™ Rat IgG2b, κ Isotype Ctrl                              | Biolegend     | 400657     |
| 22 | Alexa Fluor® 488 Rat IgG2b, κ Isotype Ctrl                                   | Biolegend     | 400625     |
| 23 | PE Mouse IgG2a, κ Isotype Ctrl                                               | Biolegend     | 400211     |
| 24 | Brilliant Violet 421™ Rat IgG2a, κ Isotype Ctrl                              | Biolegend     | 400549     |
| 25 | PE/Dazzle™ 594 Rat IgG2b, κ Isotype Ctrl                                     | Biolegend     | 400659     |
| 26 | FITC Rat IgG2a, κ Isotype Ctrl                                               | Biolegend     | 400505     |
| 27 | Alexa Fluor® 700 Rat IgG2b, κ Isotype Ctrl                                   | Biolegend     | 400628     |
| 28 | TruStain fcX™ (anti-mouse CD16/32) (达科为)                                     | Biolegend     | 101320     |
| 29 | True-Nuclear™ Transcription Factor Buffer Set                                | Biolegend     | 424401     |
| 30 | Goat anti-Mouse IgG (H+L) Cross-Adsorbed Secondary Antibody, Alexa Fluor 488 | thermo fisher | A-11001    |

#### Chemicals, peptides and Recombinant Proteins

|   |                                             |       |           |
|---|---------------------------------------------|-------|-----------|
| 1 | Penicillin-Streptomycin-Glutamine (100X)    | Gibco | 10378016  |
| 2 | FBS                                         | GIBCO | 10099-141 |
| 3 | KnockOut™ Serum Replacement - Multi-Species | Gibco | A3181502  |
| 4 | Knockout DMEM                               | GIBCO | 10829018  |
| 5 | DMEM                                        | GIBCO | 10566-016 |

|    |                                            |                          |              |
|----|--------------------------------------------|--------------------------|--------------|
| 6  | Opti-MEM                                   | Gibco                    | 31985070     |
| 7  | Lipofectamine™ 3000 Transfection Reagent   | Gibco                    | L3000015     |
| 8  | TrypLE™ Express Enzyme (1X), no phenol red | Gibco                    | 12604021     |
| 9  | Trypsin-EDTA (0.25%), phenol red           | Gibco                    | 25200072     |
| 10 | InVivoMab anti-mouse CD4                   | BioXcell                 | BE0003-1-5MG |
| 11 | InVivoMab anti-mouse CD8                   | BioXcell                 | BE0004-1-5MG |
| 12 | InVivoMab anti-mouse NK1.1                 | BioXcell                 | BE0036-5MG   |
| 13 | 100um cell strainer                        | Falcon                   | 352360       |
| 14 | 70um cell strainer                         | Falcon                   | 352350       |
| 15 | Percoll                                    | GE Health                | 17-0891-02   |
| 16 | DPBS                                       | Hyclone                  | SH30028.02   |
| 17 | MEM-Non-essential AA(10mM),100mL           | Stem cell                | #07600       |
| 18 | Gelatin,500mL                              | Stem cell                | #07903       |
| 19 | anti-SSEA-1(CD15)MicroBeads, m, h          | Miltenyi Biotec          | 130-094-530  |
| 20 | TransDetect PCR Mycoplasma Detection Kit   | Transgene Biotec         | FM311-01     |
| 21 | Myco-Blue Mycoplasma Detector              | Vazyme                   | D101-02      |
| 22 | TLRL-1826 ODN                              | Invivogen                | tlrl-1826-1  |
| 23 | Mouse IFN-r precoated ELISPOT kit          | Dakewe Biotech Co., Ltd. | 2210006      |
| 24 | Dimethyl sulfoxide ( DMSO )                | Sigma-Aldrich            | D2650        |
| 25 | Collagenase A                              | Roche                    | 10103586001  |
| 26 | Human LIF                                  | Novaprotein              | C017         |
| 27 | HBSS                                       | Servicebio               | G4204-500    |
| 28 | 10XPBS                                     | Servicebio               | G4207-500    |
| 29 | Human LIF                                  | Novaprotein              | C017         |
| 30 | anti-SSEA-1(CD15)MicroBeads, m, h          | Miltenyi Biotec          | 130-094-530  |
| 31 | CLDN6 recombinant protein                  | Dima Biotech             | PME100063    |
| 32 | mouse IFN-gamma elispot plus(plus) HRP     | MabTech                  | 3321-4HST-2  |
| 33 | VivoTrack 680 Sample Size                  | PerkinElmer              | NEV12001     |
| 34 | Bovine Serum Albumin                       | SIGMA                    | V900933-100G |
| 35 | CD8a+ MicroBeads, mouse                    | Miltenyi Biotec          | 130-104-075  |
| 36 | mouse IFN-gamma elispot plus(plus) HRP     | MabTech                  | 3321-4HST-2  |
| 37 | CD45 MicroBeads, mouse                     | Miltenyi Biotec          | 130-052-301  |
| 38 | 2'3'-cGAMP VacciGrade™                     | Invivogen                | vac-nacga23  |
| 39 | Poly(I:C) (HMW) VacciGrade™                | Invivogen                | vac-pic      |
| 40 | Mouse IFN-gamma ELISpot PLUS (HRP), strips | MabTech                  | 3321-4HST-10 |
| 41 | EmbryoMax™ Nucleosides (100X)              | merck                    | ES-008       |
| 42 | Dead cell removal kit                      | Miltenyi Biotec          | 130-090-101  |
| 43 | anti-SSEA-1(CD15)MicroBeads, m, h          | Miltenyi                 | 130-094-530  |

|    |                                                      |             |            |
|----|------------------------------------------------------|-------------|------------|
|    |                                                      | Biotec      |            |
| 44 | Liberase™ TL 研究级                                     | Roche       | 5401020001 |
| 45 | PD0325901                                            | MCE         | HY-10254   |
| 46 | CHIR99021                                            | MCE         | HY-10182   |
| 47 | Mitomycin C                                          | MCE         | HY-13316   |
| 48 | Pioglitazone                                         | MCE         | HY-13956   |
| 49 | LEGENDplex MU Th Cytokine Panel (12-plex) w/ VbP V03 | Biolegend   | 741044     |
| 50 | mouse GM-CSF ( Ecoli )                               | Novoprotein | CK02       |



Table S2

Protein local pairwise alignment between human and mouse gene, epitopes were highlighted in yellow. Canonical protein sequences were downloaded from uniprot, pairwise alignment were conducted by EMBOSS-Water with default parameter.

**CCNB1**

|             |     |                                                      |     |
|-------------|-----|------------------------------------------------------|-----|
| CCNB1_HUMAN | 1   | MALRVTRNSKINAENKAKINMAGAKRVPTAPAATSKPGLRPRTALGDIGN   | 50  |
|             |     | :     :     :     :     :     :     :     :     :    |     |
| CCNB1_MOUSE | 1   | MALRVTRNTKINAENKAKVSMAGAKRVPVTVAASKPGLRPRTALGDIGN    | 50  |
| CCNB1_HUMAN | 51  | KVSEQLQAKMPMKKEAKPSATGKVIDKKLPKPLEKVPMLVPVPVSEP---   | 97  |
|             |     | :    :    :    :    :    :    :    :    :    :       |     |
| CCNB1_MOUSE | 51  | KVSEELQARVPLKREAKTLGTGKGTVKALPKPVEK-----VPVCEPEVE    | 94  |
| CCNB1_HUMAN | 98  | VPEPEPEPEPEPVKKEEKLSPPEPILVDTASPSMETSGCAPAEEDLCQAFS  | 147 |
|             |     | :.     . . .     . . .     . . .     . . .     . . . |     |
| CCNB1_MOUSE | 95  | LAEPEPEPELEHVREEKLSPEPILVDNPSPSMETSGCAPAEYYLCQAFS    | 144 |
| CCNB1_HUMAN | 148 | DVILAVNDVDAEDGADPNLCSEYVKDIYAYLRQLEEEQAVRPKYLLGREV   | 197 |
|             |     | :    :     :     :     :     :     :     :           |     |
| CCNB1_MOUSE | 145 | DVILAVSDVDADDGADPNLCSEYVKDIYAYLRQLEEEQSVRPKYLQGREV   | 194 |
| CCNB1_HUMAN | 198 | TGNMRAILIDWLQVQMKFRLLQETMYMTVSIIDRFMQNNCVPKKMLQLV    | 247 |
|             |     | :     :     :     :     :     :     :                |     |
| CCNB1_MOUSE | 195 | TGNMRAILIDWLIQVQMKFRLLQETMYMTVSIIDRFMQNSCVPKKMLQLV   | 244 |
| CCNB1_HUMAN | 248 | GVTAMFIASKYEEMYPPEIGDFAFVTDNTYTKHQIRQMEMKILRALNFG    | 297 |
|             |     | :     :     :     :     :     :     :                |     |
| CCNB1_MOUSE | 245 | GVTAMFIASKYEEMYPPEIGDFAFVTNNTYTKHQIRQMEMKILRVLNFS    | 294 |
| CCNB1_HUMAN | 298 | GRPLPLHFLRRASKIGEVDVEQHTLAKYLMELTMDYDMVHFPPSQIAAG    | 347 |
|             |     | :     :     :     :     :     :     :                |     |
| CCNB1_MOUSE | 295 | GRPLPLHFLRRASKVGEVDVEQHTLAKYLMELSMLDYDMVHFAPSQIAAG   | 344 |
| CCNB1_HUMAN | 348 | AFCLALKILDNGEWTPTLQHYSYTESLLPVMQHLAKNVVMVQGLTKH      | 397 |
|             |     | :     :     :     :     :     :     :                |     |
| CCNB1_MOUSE | 345 | AFCLALKILDNGEWTPTLQHYSYSEDSLLPVMQHLAKNVVMVNCGLTKH    | 394 |
| CCNB1_HUMAN | 398 | MTVKNKYATSKHAKISTLPQLNSALVQDLAKAVAK 432              |     |
|             |     | .     .     .     .     .     .     .                |     |
| CCNB1_MOUSE | 395 | MTVKNKYAASKHAKISTLAQLNCTLVQNLKAVTK 429               |     |

**TOP2A**

|             |    |                                                    |     |
|-------------|----|----------------------------------------------------|-----|
| TOP2A_HUMAN | 1  | MEVSPLQPVNENMQVNKIKKNEDAKKRLSVERIYQKKTQLEHILLRPDTY | 50  |
|             |    | :     . . .     . . .     . . .     . . .          |     |
| TOP2A_MOUSE | 1  | MELSPLQPVNENMLMNK-KKNEDGKKRLSIERIYQKKTQLEHILLRPDTY | 49  |
| TOP2A_HUMAN | 51 | IGSVELVTQQMWWYDEDVGINYREVTFPVGLYKIFDEILVNAADNKQRDP | 100 |
|             |    | :     :     :     :     :     :     :              |     |
| TOP2A_MOUSE | 50 | IGSVELVTQQMWWYDEDVGINYREVTFPVGLYKIFDEILVNAADNKQRDP | 99  |

|             |     |                                                     |     |
|-------------|-----|-----------------------------------------------------|-----|
| TOP2A_HUMAN | 101 | KMSCIRVTIDPENNLISIWNNKGKIPVVEHKVEKMYVPALIFGQLLTSSN  | 150 |
|             |     | :     :                                             |     |
| TOP2A_MOUSE | 100 | KMSCIRVTIDPENNVISIWNNKGKIPVVEHKVEKIYVPALIFGQLLTSSN  | 149 |
| TOP2A_HUMAN | 151 | YDDDEKKVTGGRNGYGAKLCNIFSTKFTVETASREYKKMFKQTWMDNMGR  | 200 |
|             |     |                                                     |     |
| TOP2A_MOUSE | 150 | YDDDEKKVTGGRNGYGAKLCNIFSTKFTVETASREYKKMFKQTWMDNMGR  | 199 |
| TOP2A_HUMAN | 201 | AGEMELKPFNGEDYTCITFQPDLSKFKMQSLDKDIVALMVERRAYDIAGST | 250 |
|             |     | :     :                                             |     |
| TOP2A_MOUSE | 200 | AGDMELKPFSGEDYTCITFQPDLSKFKMQSLDKDIVALMVERRAYDIAGST | 249 |
| TOP2A_HUMAN | 251 | KDVKVFLNGNKLVPKGFERSYVDMYLKDKLDETGNLKVIEHQVNHRWEVC  | 300 |
|             |     | .     :    :     .                                  |     |
| TOP2A_MOUSE | 250 | KDVKVFLNGNSLPVKGFERSYVDLYLKDKVDETGNLKVIEHQVNPRWEVC  | 299 |
| TOP2A_HUMAN | 301 | LTMSEKGFQQISFVNSIATSKGGRHVDYVADQIVTKLVDVVKKNKGGVA   | 350 |
|             |     | :     :                                             |     |
| TOP2A_MOUSE | 300 | LTMSEKGFQQISFVNSIATSKGGRHVDYVADQIVSKLVDVVKKNKGGVA   | 349 |
| TOP2A_HUMAN | 351 | VKAHQVKNHMWIFVNALIENPTFDSQTKENMTLQPKSFGSTCQLSEKFIK  | 400 |
|             |     | .                                                   |     |
| TOP2A_MOUSE | 350 | VKAHQVKNHMWIFVNALIENPTFDSQTKENMTLQAKSFGSTCQLSEKFIK  | 399 |
| TOP2A_HUMAN | 401 | AAIGCGIVESILNWVKFKAQVQLNKKCSAVKHNRIKGI PKLDDANDAGGR | 450 |
|             |     | :     .:                                            |     |
| TOP2A_MOUSE | 400 | AAIGCGIVESILNWVKFKAQIQLNKKCSAVKHTKIKGI PKLDDANDAGSR | 449 |
| TOP2A_HUMAN | 451 | NSTECTLILTEGDSAKTLAVSGLGVVGRDKYGVFPLRGKILNVREASHKQ  | 500 |
|             |     |                                                     |     |
| TOP2A_MOUSE | 450 | NSTECTLILTEGDSAKTLAVSGLGVVGRDKYGVFPLRGKILNVREASHKQ  | 499 |
| TOP2A_HUMAN | 501 | IMENAEINNI IKIVGLQYKKNYEDEDSLKTLRYGKIMIMTDQDQDGSNIK | 550 |
|             |     |                                                     |     |
| TOP2A_MOUSE | 500 | IMENAEINNI IKIVGLQYKKNYEDEDSLKTLRYGKIMIMTDQDQDGSNIK | 549 |
| TOP2A_HUMAN | 551 | GLLINFIHHNWPSILRHRFLEEFITPIVKVSKNKQEMAFYSLPEFEEWKS  | 600 |
|             |     | :                                                   |     |
| TOP2A_MOUSE | 550 | GLLINFIHHNWPSILRHRFLEEFITPIVKVSKNKQEI AFYSLPEFEEWKS | 599 |
| TOP2A_HUMAN | 601 | STPNHKKWKVKYKGLGTSTSKAEKEYFADMKRHRIQFKYSGPEDDAAIS   | 650 |
|             |     |                                                     |     |
| TOP2A_MOUSE | 600 | STPNHKKWKVKYKGLGTSTSKAEKEYFADMKRHRIQFKYSGPEDDAAIS   | 649 |
| TOP2A_HUMAN | 651 | LAFSKKQIDDRKEWLTNFMEDRRQRKLLGLPEDYLYGQTTTYLTYNDFIN  | 700 |
|             |     | :                                                   |     |
| TOP2A_MOUSE | 650 | LAFSKKQVDDRKEWLTNFMEDRRQRKLLGLPEDYLYGQSTSYLTYNDFIN  | 699 |
| TOP2A_HUMAN | 701 | KELILFSNSDNERSIPSMVDGLKPGQRKVLFTCFKRNDKREVKVAQLAGS  | 750 |
|             |     |                                                     |     |
| TOP2A_MOUSE | 700 | KELILFSNSDNERSIPSMVDGLKPGQRKVLFTCFKRNDKREVKVAQLAGS  | 749 |
| TOP2A_HUMAN | 751 | VAEMS SYHHGEMSLMMTIINLAQNFGVSNLNLQPIGQFGTRLHGGKDS   | 800 |
|             |     |                                                     |     |
| TOP2A_MOUSE | 750 | VAEMS SYHHGEMSLMMTIINLAQNFGVSNLNLQPIGQFGTRLHGGKDS   | 799 |
| TOP2A_HUMAN | 801 | ASPRYIFTMLSSLARLLFPKDDHTLKFYDDNQRVEPEWYIPIIPMVLII   | 850 |

|             |      |                                                        |      |
|-------------|------|--------------------------------------------------------|------|
| TOP2A_MOUSE | 800  | ASPRYIFTMLSPLARLLFPKDDHTLRFLYDDNQRVPEWYIPIIPMVLII      | 849  |
| TOP2A_HUMAN | 851  | NGAEGIGTGWSCKIPNFDVREIVNNIRRLMDGEEPLPMLPSYKNFKGTIE     | 900  |
| TOP2A_MOUSE | 850  | NGAEGIGTGWSCKIPNFDVREVNNIRRLLDGEEPLPMLPSYKNFKGTIE      | 899  |
| TOP2A_HUMAN | 901  | ELAPNQYVISGEVAIILNSTTIEISELPVRTWTQTYKEQVLEPMLNGTEKT    | 950  |
| TOP2A_MOUSE | 900  | ELASNQYVINGEVAILDSTTIEISELPIRTWTQTYKEQVLEPMLNGTEKT     | 949  |
| TOP2A_HUMAN | 951  | PPLITDYREYHTDTTVKFVVKMTEEEKLAEAEERVLGHKVFKLQTSLTCNSM   | 1000 |
| TOP2A_MOUSE | 950  | PSLITDYREYHTDTTVKFVIKMTTEEEKLAEAEERVLGHKVFKLQSSSLTCNSM | 999  |
| TOP2A_HUMAN | 1001 | VLFDHVGCIIKKYDVTVDILRDFEFELRLKYYGLRKEWLLGMLGAESAKLNN   | 1050 |
| TOP2A_MOUSE | 1000 | VLFDHVGCIIKKYDVTVDILRDFEFELRLKYYGLRKEWLLGMLGAESSKLNN   | 1049 |
| TOP2A_HUMAN | 1051 | QARFILEKIDGKII IENKPKKELIKVLIQRGYSDPVKAWKEAQQKVPDE     | 1100 |
| TOP2A_MOUSE | 1050 | QARFILEKIDGKIV IENKPKKELIKVLIQRGYSDPVKAWKEAQQKVPDE     | 1099 |
| TOP2A_HUMAN | 1101 | EENEESDNEKETEKSDSVTDSGPTFNYYLLDMPLWYLTKEKKDELCLRNE     | 1150 |
| TOP2A_MOUSE | 1100 | EENEESDT--ETSTSDSAAEAGPTFNYYLLDMPLWYLTKEKKDELCKQRNE    | 1147 |
| TOP2A_HUMAN | 1151 | KEQELDTLKRKSPSDLWKEDLATFIEELEAVEAKEKQDEQVGLPGKGGKA     | 1200 |
| TOP2A_MOUSE | 1148 | KEQELNTLKQKSPSDLWKEDLAVFIEELEVEAVEAKEKQDEQVGLPGKAGKA   | 1197 |
| TOP2A_HUMAN | 1201 | KGKKTQM-AEVLPSPRGQRVIPRIT IEMKAEAEKKNKKKIKNENTEGSPQ    | 1249 |
| TOP2A_MOUSE | 1198 | KGKKAQMCADVLPSPRGKRVIPQVT VEMKAEAEKKIRKKIKSENVEGTPA    | 1247 |
| TOP2A_HUMAN | 1250 | EDGVELEGLKQRLEKKQKREP GTKTKKQTTLAFKPIKKGKKNPWSDES      | 1299 |
| TOP2A_MOUSE | 1248 | EDGAEPGSLRQRIEKKQKKEPG--AKKQTTLPFKPVKKGRKKNPWSDES      | 1295 |
| TOP2A_HUMAN | 1300 | DRSSDES NFDVPPRETEPRRAATKTKFTMDLDSDEDFSDFDEKT DDEDFV   | 1349 |
| TOP2A_MOUSE | 1296 | DVSSNES NVDVPPRQKEQRSAAAKAKFTVDLDSDEDFSGLDEKDEDEDFL    | 1345 |
| TOP2A_HUMAN | 1350 | PSDASPPKTKTSPKLSNKKELKPKQKSVVS--DLEADDVKGSVPLSSSPPAT   | 1397 |
| TOP2A_MOUSE | 1346 | PLDATPPKAKIPPKNTKKALKTQGS SMSVVDLES-DVKDSVPASPGVPAA    | 1394 |
| TOP2A_HUMAN | 1398 | HFPDETEITNPVPKKNVTVKKTA AKSQSSTSTTGAKKRAAPKGTKRDPAL    | 1447 |
| TOP2A_MOUSE | 1395 | DFPAETEQSKP-SKKTGVGKKTATKSQSSVSTAGTKKRAAPKGTKSDSAL     | 1443 |
| TOP2A_HUMAN | 1448 | NSGVSQKPDPAKTKNRRKRKPSTSDSDSNFEKIVSKAVTSKKS KGESDD     | 1497 |
| TOP2A_MOUSE | 1444 | SARVSEKPAKAKNSRKRKPSSSDSDSDFERAI SKGATSKKAKGEEQD       | 1493 |
| TOP2A_HUMAN | 1498 | FHMFDSAVAPRAKSVRAKKPIKYLEESDEDD 1529                   |      |

**ECT2**

|            |                                                          |     |
|------------|----------------------------------------------------------|-----|
| ECT2_HUMAN | 1 MAENSVLTSTTGRTSLADSSIFDSKVTEISKENLLIGSTSYVEEEMPQIE     | 50  |
|            | ::   . .:. .   :     .:.   .:.   .:.   :                 |     |
| ECT2_MOUSE | 1 MADDSVLPSPSEITSLADSSVFDKVAEMSKENLCLASTSNVDEEMPQVE      | 50  |
| ECT2_HUMAN | 51 TRVILVQEAGKQEELIKALKTIKIMEVPVIKIKESCPGKSDEKLIKSVIN    | 100 |
|            | .   : : :     :     :     :     :     :                  |     |
| ECT2_MOUSE | 51 ARVIMVQDAGKQEELLKALKTIKIMEVPVIKIKESCPGKSEEKLIKSIIN    | 100 |
| ECT2_HUMAN | 101 MDIKVGFVKMESVEEFEGLDSPFENFVVTDFQDSVFNLDYKADCRVIG     | 150 |
|            | : : . .   : : : .   :     :     :     : :                |     |
| ECT2_MOUSE | 101 MEMKVPCVKMDSMEEFESLDSPFENIFVVTDFQNSVFNLDYKADCRIVG    | 150 |
| ECT2_HUMAN | 151 PPVVLNCSQKGEPLPFSCRPLYCTSMNLVLCFTGFRKKEELVRLVTLVH    | 200 |
|            | :   : : :     :     :     :     :                        |     |
| ECT2_MOUSE | 151 PPVILNCAQRGEPLPFSCRPLYCTSMNLVLCFTGFRKKEELVRLVTLVH    | 200 |
| ECT2_HUMAN | 201 HMGGVIRKDFNSKVTHLVANCTQGEKFRVAVSLGTPI MKPEWIYKAWERR  | 250 |
|            | : . .   :     :     :     :     :                        |     |
| ECT2_MOUSE | 201 HMGGVIRKECNSKVTHLVANCTQGEKFRVAVSLGTPI MKPEWIYKAWERR  | 250 |
| ECT2_HUMAN | 251 NEQDFYAAVDDFRNEFKVPPFQDCILSFLGFSDEEKTNMEEMTEMQGGKY   | 300 |
|            | . .   :     :     :     :     :     :                    |     |
| ECT2_MOUSE | 251 NEQCFCAAVDDFRNEFKVPPFQDCILSFLGFSDEEKHSMEEMTEMQGSY    | 300 |
| ECT2_HUMAN | 301 LPLGDERCTHLVVEENIVKDLPFEPSSKLYVVKQEFWGSIQMDARAGET    | 350 |
|            | : :     : : : .   :     :     :     :                    |     |
| ECT2_MOUSE | 301 LPVGDERCTHLVVEENTVKDLPFEPSSKLYVVKQEFWGSIQMDARAGET    | 350 |
| ECT2_HUMAN | 351 MYLYEKANTPELKKSVMLSLNTPNNSNRKRRRLKETLAQLSRET DVSPFP  | 400 |
|            | :     : : : : : : : : : : : : :                          |     |
| ECT2_MOUSE | 351 MYLYEKANTPELKKSVMLSLNTPNNSNRKRRRLKETLAQLSRET DLSPFP  | 400 |
| ECT2_HUMAN | 401 PRKRPSAEHSLSIGSLDISNTPESSINYGDTPKSCTKSSKSSTPVPSKQ    | 450 |
|            | :     : : : : : : : : : : : :                            |     |
| ECT2_MOUSE | 401 PRKRPSAEHSLSIGSLDISNTPESSIHYGETPKSCAKSSRSSTPVPPKQ    | 450 |
| ECT2_HUMAN | 451 SARWQVAKELYQTESNYVNILATIIQLFQVPLEEEGQRGGPILAPEEIKT   | 500 |
|            | :     :     :     :     :     :                          |     |
| ECT2_MOUSE | 451 SARWQVAKELYQTESNYVNILATIIQLFQVPLEEEGQRGGPILAPEEIKT   | 500 |
| ECT2_HUMAN | 501 IFGSIPDIFDVHTKIKDDLEDLIVNWDESKSIGDIFLKYSKDLVKTYPPF   | 550 |
|            | :     : : : : : : : : : : :                              |     |
| ECT2_MOUSE | 501 IFGSIPDIFDVHMKIKDDLEDLIANWDESRSIGDIFLKYAKDLVKTYPPF   | 550 |
| ECT2_HUMAN | 551 VNF FEMSKETIIKCEKQKPRFHAF LKINQAKPECGRQSLVELLIRPVQRL | 600 |
|            | : .   :     :     :     :     :                          |     |
| ECT2_MOUSE | 551 VNF FEMSKEMI KCEKQKPRFHAF LKINQAKPECGRQSLVELLIRPVQRL | 600 |
| ECT2_HUMAN | 601 PSVALLNLDLKKHTADENPKSTLEKAIGSLKEVMTHINEDKRKTEAQKQ    | 650 |
|            | :     :     :     :     :     :                          |     |
| ECT2_MOUSE | 601 PSVALLNLDLKKHTADENPKSTLEKAIGSLKEVMTHINEDKRKTEAQKQ    | 650 |
| ECT2_HUMAN | 651 IFDVVYEVGDGCPANLLSSHRSLVQRVETISLGEHPCDRGEQVTLFLFNDC  | 700 |
|            | :     :     :     :     :     :                          |     |
| ECT2_MOUSE | 651 IFDVVYEVGDGCPANLLSSHRSLVQRVETVSLGEHPCDRGEQVTLFLFNDC  | 700 |



|            |     |                                                     |     |
|------------|-----|-----------------------------------------------------|-----|
| MELK_HUMAN | 401 | NGVESKSLTPALCRTPANKLKNKENVYTPKSAVKNEEYFMFPEPKTPVNK  | 450 |
|            |     | ...   ... .:. ...   ...: ... ...: ... .:. ... ...:  |     |
| MELK_MOUSE | 393 | NHAASKSPAPGVRRAVANKLMDKENVCTPKSSVKNEEQFVFSEPKIPVSK  | 442 |
| MELK_HUMAN | 451 | NQHKREILTTPNRYTTTPSKARNQCLKETPIKIPVNSTGTDKLMTGVISPE | 500 |
|            |     | :    ...: .:. ...: ... ...: .:. ... ... ... ... ... |     |
| MELK_MOUSE | 443 | NQYKREIPASPTRFPTPAKARAQCLREAPVRTPGNSAGADTLTTGVISPE  | 492 |
| MELK_HUMAN | 501 | RRCRSVELDLNQAHMEETPKRKGAKVFGSLERGLDKVITVLTRSKRKGSA  | 550 |
|            |     | : ...: ... ...: ... ...: ... ...: ... ...: ...      |     |
| MELK_MOUSE | 493 | RRCRSMVDLNLQAHMEDTPKKGKGTNVFGSLERGLDKVLTALTRNKKKGS  | 542 |
| MELK_HUMAN | 551 | RDGPRRLKLNHYNVTTTRLVNPDQLLNEIMSILPKKHVDFVQKGYTLKCQT | 600 |
|            |     | : .     ... ...: ... ...: ... ...: ... ...: ...     |     |
| MELK_MOUSE | 543 | RDGPRKRKLHYNVTTTRLVNPDQLLSEIMAILPKKNVDFVQKGYTLKCQT  | 592 |
| MELK_HUMAN | 601 | QSDFGKVTMQFELEV CQLQKPDVVGIRRQLKGDWVYKRLVEDILSSCK   | 650 |
|            |     | ... ...: ... ...: ... ...: ... ...: ... ...: ...    |     |
| MELK_MOUSE | 593 | QSDFGKVTMQFELEV CQLQRPDVVGIRRQLKGDWVYKRLVEDILSGCK   | 642 |
| MELK_HUMAN | 651 | V 651                                               |     |
|            |     | :                                                   |     |
| MELK_MOUSE | 643 | M 643                                               |     |

**ANLN**

|            |     |                                                          |     |
|------------|-----|----------------------------------------------------------|-----|
| ANLN_HUMAN | 1   | MDPFTEKLLERTRARRENLQRKMAERPTAAPRSMTHAKRARQPLSEASN-       | 49  |
|            |     | ... ...: ... ...: ... ...: ... ...: ... ...: ...         |     |
| ANLN_MOUSE | 1   | MDPFTEKLLERTRARRENLQRKMAERPTAVARSAPHAHAKRGREPLSEASNQ     | 50  |
| ANLN_HUMAN | 50  | QQPLSGGEEKSCTKPSPSKKRCSDNTEVEVSNLENKQPVESTSAKSCSPS       | 99  |
|            |     | .     ... ...: ... ...: ... ...: ... ...: ... ...:       |     |
| ANLN_MOUSE | 51  | QQPLPGGEEKSCTKPSPSKKRCSDKIEVGAPDLENTEPID--VAKPCSPM       | 98  |
| ANLN_HUMAN | 100 | PVSPQVQQAADTISDSVAVPASLLGMRRGLNSRLEATAASSVKTRMQKL        | 149 |
|            |     | ... .:. ... ...: ... ...: ... ...: ... ...: ... ...: ... |     |
| ANLN_MOUSE | 99  | PAPRQAKPPAPAAISESVAAPAALLSADRGLNSGSEASATSSVKTRMQRL       | 148 |
| ANLN_HUMAN | 150 | AEQRRRWDNDMDTDDIPESSLFSPMPSEEKAASPPRPLLSNASATPVGRR       | 199 |
|            |     | .  :  ...: .   .  : ...: ... ...: ... ...: ... ...:      |     |
| ANLN_MOUSE | 149 | AEQRRHWDS-DLTDDVSESSYFAPVPTEDKAASPSKPPISNASATPVGRR       | 197 |
| ANLN_HUMAN | 200 | GRLANLAATICSWEDDVNHSFAKQNSVQEQPGTACLKSFSSASGASARIN       | 249 |
|            |     | ... ...: ... ...: ... ...: ... ...: ... ...: ...         |     |
| ANLN_MOUSE | 198 | GRLANLAATICSWEDDVSHSSAKQNSVQEQPGTACLKSSSASGASASIN        | 247 |
| ANLN_HUMAN | 250 | SSSVKQEATFCSQRDGDASLNKALSSSADDASLVNASISSSVKATSPVKS       | 299 |
|            |     | : ... ...: ... ...: ... ...: ... ...: ... ...: ...       |     |
| ANLN_MOUSE | 248 | SSSVKQEATCCSPRDGNASVRKDPSSNAAHGPLLSASVSSSVKASSPVTA       | 297 |
| ANLN_HUMAN | 300 | TTSITDAKSCEGQNPELLPKTPI SPLKTGVSKPIVKSTLSQTVPSKGELS      | 349 |
|            |     | . .  : .:. ... ...: ... ...: ... ...: ... ...: ... ...:  |     |
| ANLN_MOUSE | 298 | ATFITENR--EAQNPELLHKT-ASPLKTEARKPCEKPTLSQGAQPKEEAN       | 344 |

|            |      |                                                      |      |
|------------|------|------------------------------------------------------|------|
| ANLN_HUMAN | 350  | REICLQSQSKDKSTTPGGTGIKPFLERFGERCQEHSKESPARSTPHRTPI   | 399  |
|            |      | :     ...   ...   :.... : .                          |      |
| ANLN_MOUSE | 345  | REVCLQSQSKDKLATPGGRGIKPFLERFGERCQEHSKESPSYRASHKTPN   | 394  |
| ANLN_HUMAN | 400  | ITPNTKAIQERLQDTSSSTTHLAQQLKQERQKELACLGRFRDKNIWS      | 449  |
|            |      | : .     :     .   :                                  |      |
| ANLN_MOUSE | 395  | ITPNTKAIQERLQNTCSSTTHLAQQLKQEREKELACLGRGLDKNLWS      | 444  |
| ANLN_HUMAN | 450  | AEKGGNSKSKQLETQETHCQSTPLKKGQVSKTQSLPVTEKVTENQIPA     | 499  |
|            |      | ... : ...   :     . : ... : ... :...                 |      |
| ANLN_MOUSE | 445  | AEKNEKSRSKHLETQEVHCQNTPLKKGQTVASTPLTSVTDKVAENEPV     | 494  |
| ANLN_HUMAN | 500  | KNSSTEPKGFTECEMTKSSPLKITLFLEEDKSLKVTSDPKVEQKIEVIRE   | 549  |
|            |      | ...   ...   :     .  : ... :                         |      |
| ANLN_MOUSE | 495  | KLSSTEPAGSTESEMTKSSPLKITLFLEEEKSLKVASDLEVEQNTAEVRE   | 544  |
| ANLN_HUMAN | 550  | IEMSVDDDDINSSKVINDLFSDVLEEGELDMEKSQEEMDQALAESSEEQE   | 599  |
|            |      | :     :     :     :     :     ... :                  |      |
| ANLN_MOUSE | 545  | VEMSVDDDEDINSSRVINDIFSDVLEEGELDVEKSEQEEMDQVGAENSEEQE | 594  |
| ANLN_HUMAN | 600  | DALNISSMSLLAPLAQTVGVVSPESLVSTPRLELKDTSRSDSPKPGKFQ    | 649  |
|            |      | ...   : ... : ... ...                                |      |
| ANLN_MOUSE | 595  | DALNISSMSLLAPLAQTVGVVSVLENISSPPSELRDSNLSAASP KPGKFQ  | 644  |
| ANLN_HUMAN | 650  | RTRVPRAESGDSLGSSEDRDLLYSIDAYRSQRFKETERPSIKQVIVRKEDV  | 699  |
|            |      | ...                                                  |      |
| ANLN_MOUSE | 645  | RTRVPRAESADSLGSSEDRDLLYSIDAYRSQRFKETERPSIKQVIVRKEDV  | 694  |
| ANLN_HUMAN | 700  | TSKLDEKNNAFPQVNIKQKMQELNNEINMQQTVIYQASQALNCCVDEEH    | 749  |
|            |      | ... ... ... ... ... ... ... ... ... ... ... ...      |      |
| ANLN_MOUSE | 695  | TSKLGEKKNVFSQVNIKQKMQELNNDINLQQTVIYQASQALNCCVDEEH    | 744  |
| ANLN_HUMAN | 750  | GKGSLEEAEAERLLLIATGKRTLLIDELNKLKNEGPQRKNKAS--PQSEF   | 797  |
|            |      | ... ... ... ... ... ... ... ... ... ... ...          |      |
| ANLN_MOUSE | 745  | GKGSLEEAEAERLLLIATEKRALLIDELNKLKSEGPQRNRNKTSVISQSEF  | 794  |
| ANLN_HUMAN | 798  | MPSKGSVTLSEIRLPLKADFVCSTVQKPDAANYYYLIILKAGAENMVATP   | 847  |
|            |      | .     ... ... ... ... ... ... ... ... ... ... ...    |      |
| ANLN_MOUSE | 795  | APSKGSVTLSEICLPLKADFVCSTAQKTDA SNYYYLIMLKAGAEQMVATP  | 844  |
| ANLN_HUMAN | 848  | LASTSNLNGDALFTTTFTLQDVSNDFEINIEVYSLVQKKDPSGLDKKK     | 897  |
|            |      | : : ... ... ... ... ... ... ... ... ... ...          |      |
| ANLN_MOUSE | 845  | LASTANSLSGDALFTPTTFLHDVSNDFEINIEVYSLVQKKDSLGPDKKK    | 894  |
| ANLN_HUMAN | 898  | KTSKSKAITPKRLLTSITTKSNIHSSVMASPGGLSAVRTSNFALVGSYTL   | 947  |
|            |      | ... ... ... ... ... ... ... ... ... ... ... ... ...  |      |
| ANLN_MOUSE | 895  | KASKSKAITPKRLLTSITKSSLHSSVMASPGGLGAVRTSNFTLVGSHTL    | 944  |
| ANLN_HUMAN | 948  | SLSSVGNTKFVLDKVPFLSSLEGHYLIKQVNSSVEERGFLTIFEDVS      | 997  |
|            |      | : ... ... ... ... ... ... ... ... ... ... ...        |      |
| ANLN_MOUSE | 945  | SLSSVGDTKFALDKVPFLSPLEGHICLKISQVNSAVEEKGFLTIFEDVS    | 994  |
| ANLN_HUMAN | 998  | GFGAWHRRWCVLSGNCISYWTPDDEKRKNPIGRINLANCTSRQIEPANR    | 1047 |
|            |      | ... ... ... ... ... ... ... ... ... ... ... ...      |      |
| ANLN_MOUSE | 995  | GFGAWHRRWCVLSGNCISYWTPDDEKRKNPIGRINLANCISHQIEPANR    | 1044 |
| ANLN_HUMAN | 1048 | EFCARRNTFELITVRPQREDDRETLVSQCRDTLCVTKNWL SADTKEERDL  | 1097 |

```

          |||||.||||||
ANLN_MOUSE 1045 EFCARRNTLELITVRPQREDDRETLVSQLCRDTLCVTKNWL SADTK EERDL
1094
ANLN_HUMAN 1098 WMQKLNQVLVDIRLWQPDACYKPIGKP 1124
          |||||:|||||:|
ANLN_MOUSE 1095 WMQKLNQVIVDIRLWQPDACYKPVGKP 1121

```

**HMMR**

```

HMMR_HUMAN 1 MSFPKAPLKRFNDPSPGAPSPGAYDVKTLEVLKGPVSFQKSQRFKQQKES 50
          |||||:|||||:|
HMMR_MOUSE 1 MSFPKAPLKRFNDPSPGAPSPGAYDVKTSEATKGPVSFQKSQRFKNQRES 50
          |||||:|||||:|
HMMR_HUMAN 51 KQNLNVDKDITLTPASARKVKSSSES-KESQKNDKDLKILEKEIRVLLQERG 99
          :|||:|||||.|||:|.|.|.| |:|||||:|.|||||.|||||
HMMR_MOUSE 51 QQNLNIDKDTLLASAKKAKSVSKKDSQKNDKDVKRLEKEIRALLQERG 100
          |||||:|||||:|
HMMR_HUMAN 100 AQDRRIQDLETELEKMEARLNAALREKTSLSANNATLEKQLIELTRTNEL 149
          .||:||||:|:||||.||:||||:|||||:|:|:|.||||.|||
HMMR_MOUSE 101 TQDKRIQDMESELEKTEAKLNAAVREKTSLSASNASLEKRLTELTRANEL 150
          |||||:|||||:|
HMMR_HUMAN 150 LKSKFSENGNQKNLRILSLELMKLRNKRETKMRGMMAKQEGMEMKLQVTQ 199
          ||:||||:|:||||.|||||:|:|:|:|:|:|:|:|
HMMR_MOUSE 151 LKAKFSEGDGHQKNMRALSLELMKLRNKRETKMRSMMVKQEGMELKQATQ 200
          |||||:|||||:|
HMMR_HUMAN 200 RSLEESQGKIAQLEGKLVSIIEKEKIDEKSETEKLLLEYIEEISCASDQVEK 249
          :.|.||:||||.|||||:|:|:|:|:|:|:|:|
HMMR_MOUSE 201 KDLTESKGGKIVQLEGKLVSIIEKEKIDEKCETEKLLLEYIQEISCASDQVEK 250
          |||||:|||||:|
HMMR_HUMAN 250 YKLDIAQLEENLKEKNDIILSLKQSLEENIVILSKQVEDLNVKCQLEKE 299
          .||:|||||:||||:|.|||||:|:|:|:|:|:|:|:|
HMMR_MOUSE 251 CKVDIAQLEEDLKEKDREILSLKQSLEENIT-FSKQIEDLTVKCQLETE 299
          |||||:|||||:|
HMMR_HUMAN 300 KEDHVNRNREHNENLNAEMQNLKQKFILEQQEREKQQKELQIDSLQEQE 349
          :.:.|:|:|:|:|:|:|:|:|:|:|:|:|:|:|:|:|:|
HMMR_MOUSE 300 RDNLVSKDRERAETLSAEMQILTERLALERQEYKELQKELQSQSLQEQE 349
          |||||:|||||:|
HMMR_HUMAN 350 KELSSSLHQKLCFQEQEEMVKEKNLFEELKQTLDELKQKQEEQAERLV 399
          ||||:|.||:|||||:|.|||:|:|:|:|.||:|:|:|:|:|
HMMR_MOUSE 350 KELSARLQQQLCSFQEQEEMTSEKNVFKKELKLALAE L DAVQQKQEEQSERLV 399
          |||||:|||||:|
HMMR_HUMAN 400 QLEEEAKSRAEELKLLLEKLGKAELEKSSAAHTQATLL----- 440
          |||||.||.||:|.||:|.||:|.||.||||.||||.||:|
HMMR_MOUSE 400 QLEEEETKSTAEQLTRLDNLLREKEVELEKHIAAHAQAAILIAQEKYNDTA 449
          -----
HMMR_HUMAN 441 441 440
HMMR_MOUSE 450 QSLRDVTAQLESVQEKEYNDTAQSLRDVTAQLESEQEKEYNDTAQSLRDVTA 499
          |||||:|||||:|
HMMR_HUMAN 441 -----LQEKYDSMVQSLEDVTAQFESYKAL 465
          :||||:|.||.||||.||||:|
HMMR_MOUSE 500 QLESEQEKEYNDTAQSLRDVTAQLESVQEKEYNDTAQSLRDVTAQLESYKSS 549
          |||||:|||||:|
HMMR_HUMAN 466 TASEIEDLKLENSLQEKAAKAGKNAEDVQHQILATESSNQEVYRMLLDL 515
          |.|||||:|:|:|.||:|.||:|.||:|.||:|.||:|.||
HMMR_MOUSE 550 TLKEIEDLKLENLTLQEKVAMA EKSVEDVQQQILTAESTNQEYARMVQDL 599
          |||||:|||||:|
HMMR_HUMAN 516 QTKSALKETEIKEITVSFLQKITDLQNQLKQEQEEDFRKQLEDEEGRKAEK 565

```



|            |     |                                                     |     |
|------------|-----|-----------------------------------------------------|-----|
| HMMR_MOUSE | 600 | QNRSTLKEEEIKEITSSFLEKITDLKNQLRQQDEDFRKQLEEKGRKRTAEK | 649 |
| HMMR_HUMAN | 566 | ENTTAELTEEINKWRLLYEELYNKTKPFQLQLDAFEVEKQALLNEHGAAQ  | 615 |
| HMMR_MOUSE | 650 | ENVMTLMEINKWRLLYEELYEYKTKPFQQQLDAFEAEKQALLNEHGATQ   | 699 |
| HMMR_HUMAN | 616 | EQLNKIRDSYAKLLGHQNLKQKIKHVVKLKDENSQKSEVSKLRCQLAKK   | 665 |
| HMMR_MOUSE | 700 | EQLNKIRDSYAQLLGHQNLKQKIKHVVKLKDENSQKSEVSKLRSQLVKKR  | 749 |
| HMMR_HUMAN | 666 | KQSETKLQEELNKVLGIKHFDPKAFHHESKENFALKTPLKEGNTNC      | 712 |
| HMMR_MOUSE | 750 | KQNELRLQGELDKALGIRHFDPSKAFCHASKENF---TPLKEGNPNC     | 793 |

## IGF2BP1

|             |     |                                                                      |     |
|-------------|-----|----------------------------------------------------------------------|-----|
| IF2B1_HUMAN | 1   | MNKLYIGNLNESVTPADLEKVF AEHK <b>ISYSGQFLV</b> KSGYAFVDCPDEH <b>WA</b> | 50  |
| IF2B1_MOUSE | 1   | MNKLYIGNLNESVTPADLEKVF AEHK <b>ISYSGQFLV</b> KSGYAFVDCPDEH <b>WA</b> | 50  |
| IF2B1_HUMAN | 51  | <b>MKAIETF</b> SGKVELQGKRLEIEHSVPKKQRSRKIQIRNIPPQLRWEVLDSL           | 100 |
| IF2B1_MOUSE | 51  | <b>MKAIETF</b> SGKVELQGKRLEIEHSVPKKQRSRKIQIRNIPPQLRWEVLDSL           | 100 |
| IF2B1_HUMAN | 101 | LAQYGTVENCEQVNTESSETAVVNVTYSNREQTRQAIMKLNHGHQLENHALK                 | 150 |
| IF2B1_MOUSE | 101 | LAQYGTVENCEQVNTESSETAVVNVTYSNREQTRQAIMKLNHGHQLENHALK                 | 150 |
| IF2B1_HUMAN | 151 | VSYIPDEQIAQGPENGRGGFGSRGQPRQGS PVAAGAPAKQQQVDIPLRL                   | 200 |
| IF2B1_MOUSE | 151 | VSYIPDEQITQGPENGRGGFGSRGQPRQGS PVAAGAPAKQQPVDIPLRL                   | 200 |
| IF2B1_HUMAN | 201 | LVPTQYVGAIIGKEGATIRNITKQTQSKIDVHRKENAGAAEK AISVHSTP                  | 250 |
| IF2B1_MOUSE | 201 | LVPTQYVGAIIGKEGATIRNITKQTQSKIDVHRKENAGAAEK AISVHSTP                  | 250 |
| IF2B1_HUMAN | 251 | EGCSSACKMILEIMHKEAKDTKTADDEVPLKILAHNNFVGRLIGKEGRNLK                  | 300 |
| IF2B1_MOUSE | 251 | EGCSSACKMILEIMHKEAKDTKTADDEVPLKILAHNNFVGRLIGKEGRNLK                  | 300 |
| IF2B1_HUMAN | 301 | KVEQDTETKITISSLQDLTLYNPERTITVKGAIENCCRAEQEIMKKVREA                   | 350 |
| IF2B1_MOUSE | 301 | KVEQDTETKITISSLQDLTLYNPERTITVKGAIENCCRAEQEIMKKVREA                   | 350 |
| IF2B1_HUMAN | 351 | YENDV <b>AAMSLQSHL</b> IPGLNLAAVGLFPASSAVPPPPSSVTGAAPYSSFM           | 400 |
| IF2B1_MOUSE | 351 | YENDV <b>AAMSLQSHL</b> IPGLNLAAVGLFPASSAVPPPPSSVTGAAPYSSFM           | 400 |
| IF2B1_HUMAN | 401 | QAPEQEMVQVFI PAQAVGAIIGKKGQHIKQLSRFASASIKIAPPETPDSK                  | 450 |
| IF2B1_MOUSE | 401 | QAPEQEMVQVFI PAQAVGAIIGKKGQHIKQLSRFASASIKIAPPETPDSK                  | 450 |
| IF2B1_HUMAN | 451 | VRMVIITGPPEAQFKAQGRIYGK LKEENFFGPKKEEVKLETHIRVPASAAG                 | 500 |

|             |     |                                                     |     |
|-------------|-----|-----------------------------------------------------|-----|
| IF2B1_MOUSE | 451 | VRMVVITGPPEAQFKAQGRIYGKLKEENFFGPKKEEVKLETHIRVPASAAG | 500 |
| IF2B1_HUMAN | 501 | RVIGKGGKTVNELQNLTAAEVVVPRDQTPDENDQVIVKIIGHFYASQMAQ  | 550 |
|             |     |                                                     |     |
| IF2B1_MOUSE | 501 | RVIGKGGKTVNELQNLTAAEVVVPRDQTPDENDQVIVKIIGHFYASQMAQ  | 550 |
| IF2B1_HUMAN | 551 | RKIRDILAQVKQQHQKQSNQAQARRK                          | 577 |
|             |     |                                                     |     |
| IF2B1_MOUSE | 551 | RKIRDILAQVKQQHQKQSNLAQARRK                          | 577 |
